# Supplementary material for: A Gateway-Based System for Fast Evaluation of Protein-Protein Interactions in Bacteria
Source: PubMed Central journal article supplement (PMC4391838; doi:10.1371/journal.pone.0123646), 2015-04-09
Supplement: pone.0123646.s002.pdf [file pone.0123646.s002.pdf]

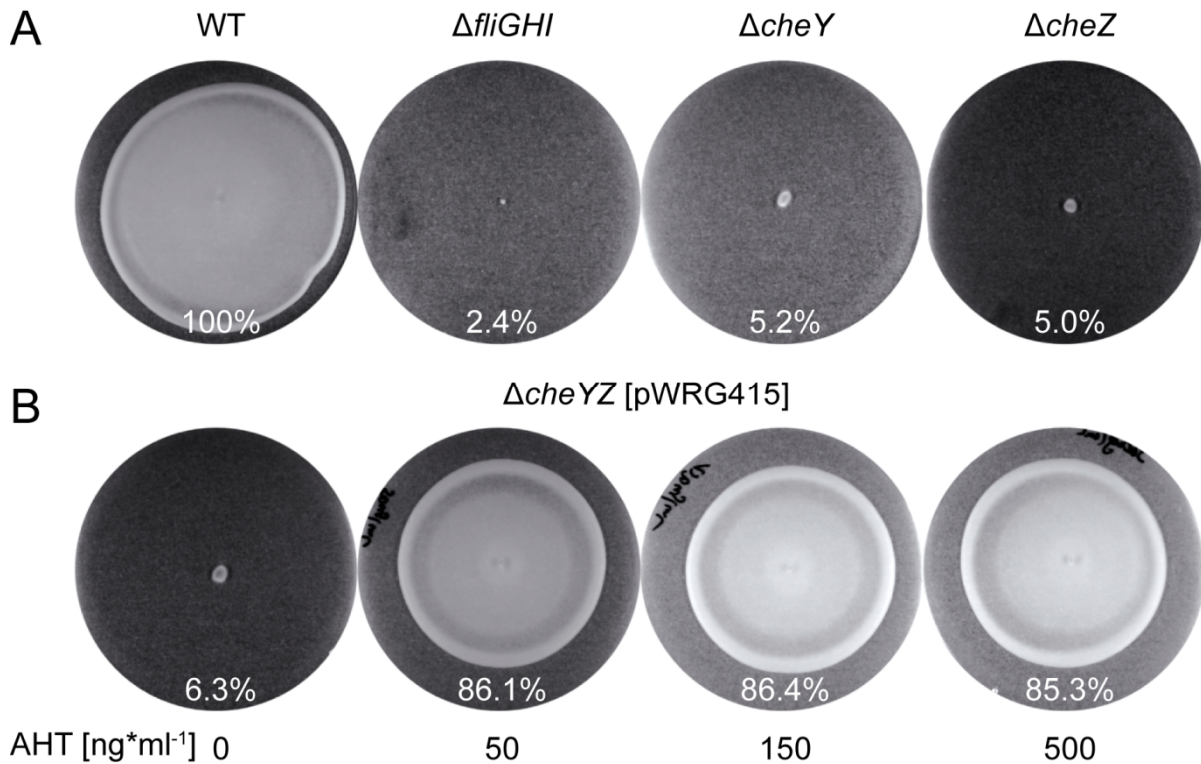

**S2 Figure. Functional analysis of CheY-YFP and CheZ-CFP fusion proteins.**

Functionality of the chemotaxis system was assessed using the swarming behavior of different *S. Typhimurium* strains on soft agar plates. (A) The swarm colony formation by *Salmonella* NCTC 12023 wild-type (WT) served as a positive control. Strain M913 ( $\Delta fliGHI$ ) is a nonmotile control and strains MvP1212 ( $\Delta cheY$ ) and WRG105 ( $\Delta cheZ$ ) do not show chemotaxis. (B) Swarm colony formation by strain WRG106  $\Delta cheYZ$  [pWRG415] expressing CheY-YFP and CheZ-CFP upon addition of different concentrations of the inducer anhydrotetracycline (AHT). Percentages indicate the diameter of the swarm colony in % of the WT control.
