# Supplementary material for: A Gateway-Based System for Fast Evaluation of Protein-Protein Interactions in Bacteria
Source: PLOS journal article supplement (doi:10.1371/journal.pone.0123646), 2015-04-09
Supplement: S1 (10.1371/journal.pone.0123646.s001) [file journal.pone.0123646.s001]

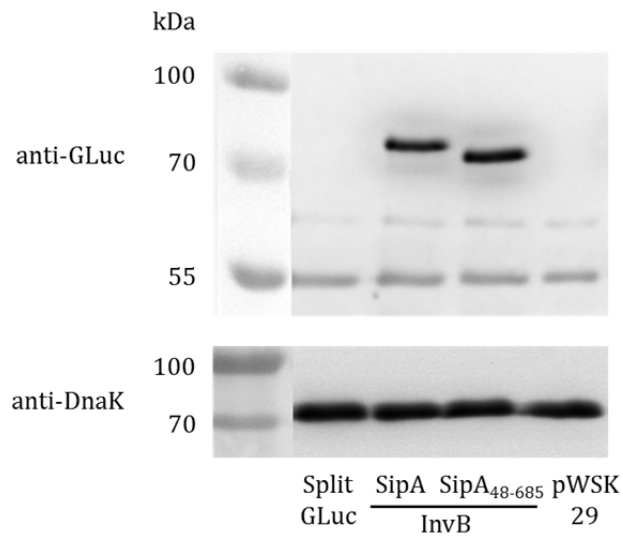

**S1 Figure. Western-Blot detecting Gluc fusion proteins in bacterial lysates.** Samples were subjected to protein electrophoresis using Bis-Tris gradient gels. A polyclonal anti-Gluc antibody was used to detect SipA<sup>1-685</sup>-C-Gluc<sub>106</sub> and SipA<sup>48-685</sup>-C-Gluc<sub>106</sub>. InvB-N-Gluc<sub>105</sub> could not be detected by this antibody (upper panel). As control DnaK was detected with a monoclonal antibody (lower panel).
